# Supplementary material
Source: ML conference proceedings conference paper supplement (https://openaccess.thecvf.com/content/cvpr_2015/html/Lan_Beyond_Gaussian_Pyramid_2015_CVPR_paper.html)
Supplement: Supplementary file 1 [file Lan_Beyond_Gaussian_Pyramid_2015_CVPR_supplemental.pdf]

# Beyond Gaussian Pyramid: Multi-skip Feature Stacking for Action Recognition

Zhenzhong Lan, Ming Lin, Xuanchong Li, Alexander G. Hauptmann, Bhiksha Raj  
 School of Computer Science, Carnegie Mellon University  
 lanzhzh, minglin, xcli, alex, bhiksha@cs.cmu.edu

## Abstract

*This is the supplementary material for the paper entitled "Beyond Gaussian Pyramid: Multi-skip Feature Stacking for Action Recognition". The material gives the proof of theorem 1 and 2.*

## 1. Proof

We present the proofs of the following two theorems.

**Theorem 1.** *Given a fixed time skip  $\tau$ , with probability at least  $1 - \delta$ , the condition number  $\beta(PP^T)$  is bounded by*

$$\beta(PP^T) \leq \frac{(1+c)\exp(-\gamma_1/\tau) + \Delta_\tau}{\exp(-\gamma_k/\tau) - \Delta_\tau} \quad (1)$$

$$\beta(PP^T) \geq \frac{(1+c)\exp(-\gamma_1/\tau) - \Delta_\tau}{\exp(-\gamma_k/\tau) + \Delta_\tau}. \quad (2)$$

where

$$\Delta_\tau = 2\sqrt{k\frac{1}{T}(1+c)\log(2k/\delta)} \quad (3)$$

provided the number of feature points

$$T \geq \frac{1}{9(1+c)}k\log(2k/\delta). \quad (4)$$

**Theorem 2.** *With probability at least  $1 - \delta$ , the condition number of  $PP^T$  in the MIFS is bounded by*

$$\beta(PP^T) \leq \frac{\sum_i \frac{T_i}{T} 2(1+c)\exp(-\gamma_1/\tau_i) + \Delta_\tau}{\sum_i \frac{T_i}{T} 2\exp(-\gamma_k/\tau_i) - \Delta_\tau}. \quad (5)$$

where

$$\Delta_\tau \leq 2\sqrt{k\frac{1}{\sum_i T_i}(1+c)\log(2k/\delta)}. \quad (6)$$

provided the number of feature points

$$T \geq \frac{1}{9(1+c)}k\log(2k/\delta). \quad (7)$$

Our proofs are based on the following Matrix Bernstein's Inequality.

**Lemma 1** (Matrix Bernstein's Inequality). *Let  $\mathbf{x}_i \in \mathbb{R}^{p \times 1}$ ,  $\|\mathbf{x}_i\|^2 \leq B$ .  $S = \mathbf{x}_1\mathbf{x}_1^T + \dots + \mathbf{x}_n\mathbf{x}_n^T$ . Then with probability at least  $1 - \delta$ ,*

$$\|S - \mathbb{E}\{S\}\| \leq \sqrt{2B\|\mathbb{E}\{S\}\| \log(2p/\delta)} + \frac{B}{3} \log(2p/\delta). \quad (8)$$

## 1.1. Proof of Theorem 1

*Proof.* For the  $i$ -th row,  $j$ -th column of  $P$ ,

$$|P_{i,j}| = [\alpha_i(t_j + \tau) - \alpha_i(t_j)] \leq 2 \quad (9)$$

$$\|P_j\|^2 \leq 4k \quad (10)$$

$$\mathbb{E}\{P_{i,j}^2\} \leq 2(1+c) \exp(-\gamma/\tau) \quad (11)$$

$$\mathbb{E}\{P_{i,j}^2\} \geq 2 \exp(-\gamma/\tau) \quad (12)$$

$$\mathbb{E}\{P_{i,j}P_{k,j}\} = 0 \quad i \neq k \quad (13)$$

$$\lambda_{\max}\{\mathbb{E}\{P_jP_j^T\}\} = \frac{1}{T} \lambda_{\max}\{\mathbb{E}\{PP^T\}\} \leq 2(1+c) \exp(-\gamma_1/\tau) \quad (14)$$

$$\lambda_{\min}\{\mathbb{E}\{P_jP_j^T\}\} = \frac{1}{T} \lambda_{\min}\{\mathbb{E}\{PP^T\}\} \geq 2 \exp(-\gamma_k/\tau) . \quad (15)$$

By Matrix Bernstein's inequality, with probability at least  $1 - \delta$ , we have

$$\begin{aligned} 4T\Delta_\tau \triangleq \|PP^T - \mathbb{E}\{PP^T\}\| &\leq \sqrt{2 \times 4k \times 2T(1+c) \exp(-\gamma_1/\tau) \log(2k/\delta)} + \frac{4k}{3} \log(2k/\delta) \\ &= 4\sqrt{kT(1+c) \exp(-\gamma_1/\tau) \log(2k/\delta)} + \frac{4}{3}k \log(2k/\delta) \\ &\leq 4\sqrt{kT(1+c) \log(2k/\delta)} + \frac{4}{3}k \log(2k/\delta) \end{aligned} \quad (16)$$

When

$$T \geq \frac{1}{9(1+c)} k \log(2k/\delta) \quad (17)$$

we have

$$\Delta_\tau \leq 2\sqrt{k \frac{1}{T} (1+c) \log(2k/\delta)} \quad (18)$$

Therefore, when  $T$  is large enough,

$$\beta(PP^T) \leq \frac{(1+c) \exp(-\gamma_1/\tau) + \Delta_\tau}{\exp(-\gamma_k/\tau) - \Delta_\tau} . \quad (19)$$

A lower bound on  $\beta(PP^T)$  could be given similarly by changing  $\Delta_\tau$  to  $-\Delta_\tau$ .  $\square$

## 1.2. Proof of Theorem 2

*Proof.* The proof is similar to Theorem 1, except that now we have  $P_i$  that is sampled from  $m$  different distributions. The  $i$ -th component of  $P_i$  is sampled from  $i\tau$  skip with probability  $T_i / \sum_j T_j = T_i/T$ , where  $T = \sum_j T_j$  is the total number of features. Follow the proof of Theorem 1, we have:

$$|P_{i,j}| \leq 2 \quad (20)$$

$$\|P_j\|^2 \leq 4k \quad (21)$$

$$\mathbb{E}\{P_{i,j}^2\} \leq \sum_i \frac{T_i}{T} 2(1+c) \exp(-\gamma/\tau_i) \quad (22)$$

$$\mathbb{E}\{P_{i,j}^2\} \geq \sum_i \frac{T_i}{T} 2 \exp(-\gamma/\tau_i) \quad (23)$$

$$\mathbb{E}\{P_{i,j}P_{k,j}\} = 0 \quad i \neq k \quad (24)$$

$$\lambda_{\max}\{\mathbb{E}\{P_jP_j^T\}\} = \frac{1}{T} \lambda_{\max}\{\mathbb{E}\{PP^T\}\} \leq \sum_i \frac{T_i}{T} 2(1+c) \exp(-\gamma_1/\tau_i) \quad (25)$$

$$\lambda_{\min}\{\mathbb{E}\{P_jP_j^T\}\} = \frac{1}{T} \lambda_{\min}\{\mathbb{E}\{PP^T\}\} \geq \sum_i \frac{T_i}{T} 2 \exp(-\gamma_k/\tau_i) \quad (26)$$

By Matrix Bernstein's inequality, with probability at least  $1 - \delta$ , we have

$$\begin{aligned}
4T\Delta_\tau &\triangleq \|PP^T - \mathbb{E}\{PP^T\}\| \leq \sqrt{2 \times 4k \times \left[\sum_i T_i 2(1+c) \exp(-\gamma/\tau_i)\right] \log(2k/\delta)} + \frac{4k}{3} \log(2k/\delta) \\
&= 4 \sqrt{k \left[\sum_i T_i (1+c) \exp(-\gamma/\tau_i)\right] \log(2k/\delta)} + \frac{4}{3} k \log(2k/\delta) \\
&\leq 4 \sqrt{k(1+c)T \log(2k/\delta)} + \frac{4}{3} k \log(2k/\delta) \tag{27}
\end{aligned}$$

When

$$T \geq \frac{1}{9(1+c)} k \log(2k/\delta) \tag{28}$$

we have

$$\Delta_\tau \leq 2 \sqrt{k \frac{1}{T} (1+c) \log(2k/\delta)} \tag{29}$$

$$\beta(PP^T) \leq \frac{\sum_i \frac{T_i}{T} 2(1+c) \exp(-\gamma_1/\tau_i) + \Delta_\tau}{\sum_i \frac{T_i}{T} 2 \exp(-\gamma_k/\tau_i) - \Delta_\tau}. \tag{30}$$

□
